# Supplementary material for: Directing the H2-driven selective regeneration of NADH via Sn-doped Pt/SiO2
Source: Royal Society of Chemistry journal article supplement (doi:10.1039/d1gc04414a), 2022-01-01
Supplement: d1gc04414a1.pdf [file d1gc04414a1.pdf]

## Supplementary Information

### Directing the H<sub>2</sub>-driven Selective Regeneration of NADH via Sn-doped Pt/SiO<sub>2</sub>

Joseph W. H. Burnett,<sup>1,2,#</sup> Jianwei Li,<sup>1,#</sup> Alan J. McCue,<sup>3</sup> Panagiotis N.  
Kechagiopoulos,<sup>2</sup> Russell F. Howe,<sup>3</sup> and Xiaodong Wang<sup>1,\*</sup>

<sup>1</sup>Chemical Engineering, Department of Engineering, Lancaster University, Lancaster  
LA1 4YW, United Kingdom

<sup>2</sup>Chemical and Materials Engineering, School of Engineering, University of Aberdeen,  
Aberdeen AB24 3UE, United Kingdom

<sup>3</sup>Chemistry Department, University of Aberdeen, Aberdeen AB24 3UE, United  
Kingdom

\*Corresponding author E-mail:

xiaodong.wang@lancaster.ac.uk

#These authors contributed equally to this work.

## Experimental

### Materials

$\beta$ -Nicotinamide adenine dinucleotide hydrate ( $\text{NAD}^+$ ,  $\geq 96.5\%$ ),  $\beta$ -nicotinamide adenine dinucleotide reduced disodium salt hydrate ( $\text{NADH}$ ,  $\geq 94\%$ ), potassium phosphate monobasic ( $\text{KH}_2\text{PO}_4$ ,  $\geq 99\%$ ), potassium phosphate dibasic trihydrate ( $\text{K}_2\text{HPO}_4 \cdot 3\text{H}_2\text{O}$ ,  $\geq 99\%$ ), hexachloroplatinic acid solution ( $\text{H}_2\text{PtCl}_6$ , 8% in water), tin(II) chloride ( $\text{SnCl}_2$ ,  $\geq 99\%$ ), and silicon dioxide ( $\text{SiO}_2$ , 99.5%) were obtained from Sigma-Aldrich. EnzyChrom™ NAD/NADH assay kit was purchased from Universal Biologicals. All the chemicals were used as received without further purification. The  $\text{H}_2$  and  $\text{N}_2$  gases of ultrahigh purity ( $\geq 99.99\%$ ) were supplied by BOC.

### Catalyst Preparation and Characterisation

Pt-Sn/ $\text{SiO}_2$  catalysts were prepared by wet impregnation whereby  $\text{SiO}_2$  was co-impregnated with aqueous solutions of  $\text{H}_2\text{PtCl}_6$  and  $\text{SnCl}_2$ . After impregnation, the mixture was heated to 80 °C until a slurry formed and then dried in static air overnight at 110 °C. The catalysts were calcined in static air at 500 °C for 4 hrs then reduced under 10 %  $\text{H}_2/\text{N}_2$  at 500 °C for 4 hrs. In all cases, the Pt loading was fixed at 1 wt.% and the amount of Sn added is expressed in terms of nominal atomic percent. For example, Pt90 refers to a catalyst containing 90 at.% Pt and 10 at.% Sn supported on  $\text{SiO}_2$ . A 1 wt.% Pt/ $\text{SiO}_2$  (Pt100) was also prepared by wet impregnation for comparison purposes.

CO chemisorption experiments were performed using a Thermo Scientific TPDRO 1100 at 35 °C. The catalysts (~0.1 g) were re-reduced in 5 %  $\text{H}_2/\text{He}$  (500 °C, 30 min) then flushed with He (500 °C, 30 min) and then cooled to 35 °C under He. Known volumes of CO (equating to ~2.3  $\mu\text{moles}$ ) were pulsed over the catalysts until no further adsorption occurred. Blank experiments using  $\text{SiO}_2$  and Sn/ $\text{SiO}_2$  were

performed and no CO uptake was observed. Transmission electron microscopy (TEM) was used to determine the particle size and morphology. A JEM-2100F was utilised at 200 kV and a minimum of 300 particles were measured to determine average particle sizes and size distributions histograms. STEM/EDX analysis was carried out using JEM-F200 (JOEL) Field Emission Transmission Electron Microscope at 200 kV. Metal loading was analysed by inductive coupled plasma emission spectrometer (ICP-OES, Varian VISTA-MPX). Aqua regia solution (HCl: HNO<sub>3</sub> = 3:1, v/v) was used to dissolve the metals while hydrofluoric acid (HF) was used for the SiO<sub>2</sub> support. The diffraction patterns were studied using X-Ray Diffraction (XRD) using a Rigaku D/max-2500 instrument (Cu K $\alpha$ , 0.154 nm). Samples were scanned at 0.02° step<sup>-1</sup> over the range 10° ≤ 2 $\theta$  ≤ 90° and the diffractograms identified against the JCPDS-ICDD database. Surface area and porosity were investigated with N<sub>2</sub> adsorption/desorption using a Micromeritics ASAP 2460 at -196 °C and the BET method was applied to determine the surface area. X-ray photoelectron spectroscopy (XPS) was carried out on a Perkin Elmer PHI 1600 using a monochromatic Al K $\alpha$  source and a pass energy of 50 eV. <sup>1</sup>H NMR experiments were all performed in D<sub>2</sub>O using an Advance III HD 400 Bruker Daltonics NMR at room temperature.

### **Catalyst Testing**

Liquid phase hydrogenation of NAD<sup>+</sup> was carried out in a Parr-5500 Compact Reactor at ambient temperature (22 °C). In a typical reaction, NAD<sup>+</sup> was dissolved in 50 ml of 0.1 M, pH 7 phosphate buffer and then a specific mass of catalyst (0.005-0.020 g) was added, and then the mixture of reactant and catalyst was loaded into the reactor. The reactor was stirred at 900 rpm, flushed 3 times with 5 bar of N<sub>2</sub> then pressurised with 9 bar of H<sub>2</sub>, initiating the reaction. Samples were taken using a non-invasive sampling system and the reactant and products were quantified using a combination of UV-Vis

spectroscopy (Jenway 6850) and enzymatic assays as described in our previous work.<sup>1</sup> It is noteworthy that we have developed such analytical methods specifically for the experimental quantification of NAD<sup>+</sup>/NADH systems allowing the calculation of conversion of NAD<sup>+</sup> (Eq. 1), selectivity (Eq. 2) of 1,4-NADH, 1,2-NADH and 1,6-NADH and material/carbon balance ( $\pm 2\%$  in this work). In the case of Pt100, other product(s), defined as unknown, can be determined by closing the mass balance. <sup>1</sup>H NMR was also employed in conjunction with the developed analytical method, whereby the reactions using Pt100 and Pt90 were repeated using a higher concentration of NAD<sup>+</sup>, to ensure good visibility in the <sup>1</sup>H NMR spectra. Specifically, 6 mM of NAD<sup>+</sup> was dissolved in a 0.1 M, pH 7 phosphate buffer in D<sub>2</sub>O and 40 mg of catalyst was used. After ~50 % conversion was achieved (determined by UV-Vis spectroscopy and enzymatic assays), the sample was taken and the <sup>1</sup>H NMR spectra was obtained. All the analyses were conducted on an Advance III HD 400 NMR from Bruker Daltonics (equipped with shielded z-gradient coils for gradient spectroscopy (GRASP)) at room temperature.

The activity of the catalysts was assessed using turnover frequency (TOF), calculated based on the moles of NAD<sup>+</sup> converted (in the initial 5 min of the reaction) over the moles of Pt active sites (determined by CO chemisorption). Conversion and selectivity were determined using the following equations, respectively. Blank tests using SiO<sub>2</sub> and Sn/SiO<sub>2</sub> were performed and both catalysts were inactive for the hydrogenation of NAD<sup>+</sup>. Error bars were obtained from triplicate experiments.

$$X_{\text{NAD}^+} (\%) = \frac{C_{\text{NAD}^+, \text{initial}} (\text{mM}) - C_{\text{NAD}^+, \text{left}} (\text{mM})}{C_{\text{NAD}^+, \text{initial}} (\text{mM})} \times 100 \quad (1)$$

$$\textit{Selectivity}_{\text{species}} (\%) = \frac{C_{\text{species}} (\text{mM})}{C_{\text{NAD}^+, \text{reacted}} (\text{mM})} \times 100 \quad (2)$$

## Characterisation Figure

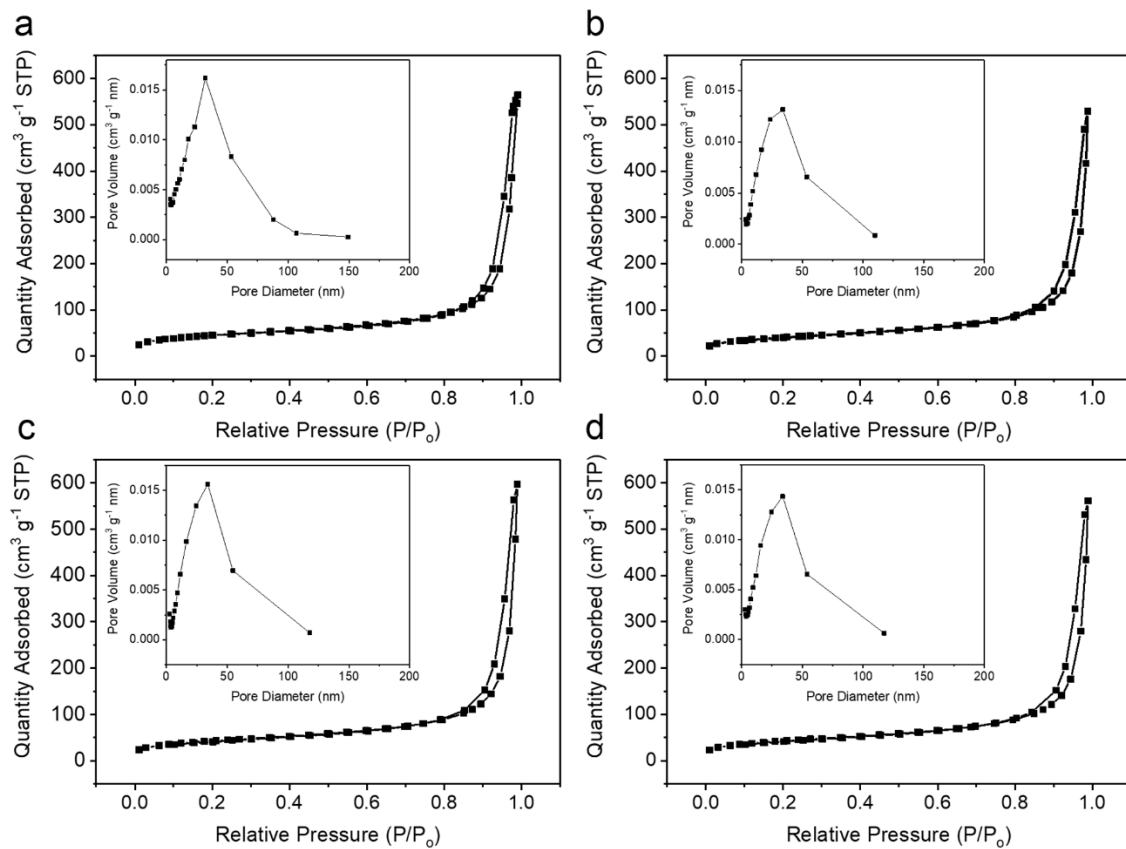

**Figure S1:** N<sub>2</sub> adsorption/desorption isotherms for (a) Pt100, (b) Pt90, (c) Pt75 and (d) Pt50. Inset: corresponding pore size distributions.

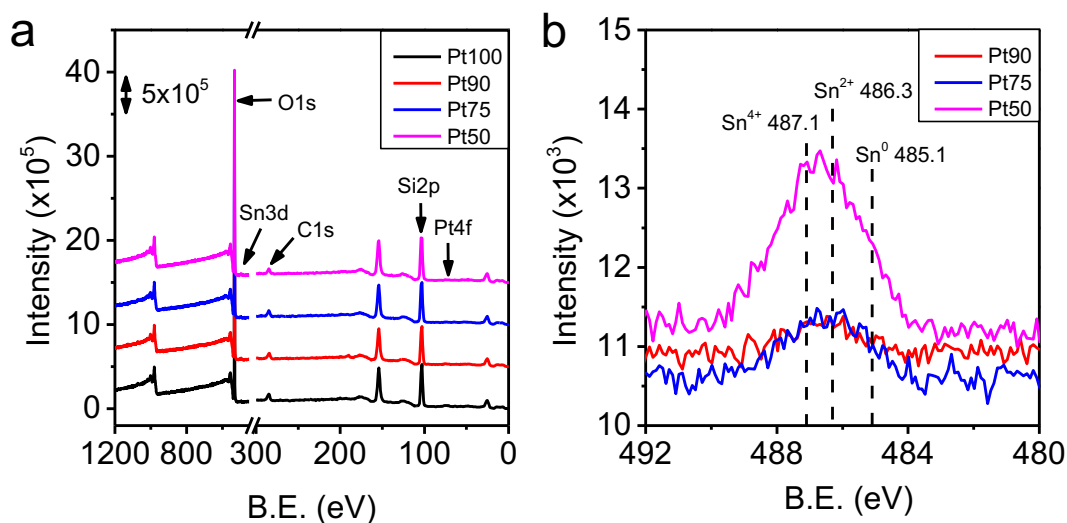

**Figure S2:** (a) Full XPS scans of catalysts and (b) spectra over the Sn 3d region.

The full scan XP spectra of Pt mono- and bi- metallic catalysts are shown in Figure S2(a). The detailed Sn 3d profiles (Figure S2(b)) have presented a high shift to 486.3 and 487.1 eV, corresponding to the positive charged Sn with valences of +2 and +4. Compared to the metallic Sn<sup>0</sup> state (485.1 eV), it evidenced the electron donation from Sn to Pt.<sup>2</sup> This is consistent with the Pt 4f results shown in the main text, where increasing Sn content lowers the oxidation state of Pt.

#### References:

1. T. Saba, J. W. H. Burnett, J. W. Li, P. N. Kechagiopoulos and X. D. Wang, *Chem. Commun.*, 2020, **56**, 1231-1234.
2. H. Rong, Z. Niu, Y. Zhao, H. Cheng, Z. Li, L. Ma, J. Li, S. Wei and Y. Li, *Chem. Eur. J.*, 2015, **21**, 12034-12041.
